# Supplementary material for: Systems Biology Applied to the Study of Papaya Fruit Ripening: The Influence of Ethylene on Pulp Softening
Source: MDPI journal article supplement (doi:10.3390/cells10092339), 2021-09-07
Supplement: s1 [file s1]

## Article

# Systems Biology Applied to the Study of Papaya Fruit Ripening: The Influence of Ethylene on Pulp Softening

Caroline Giacomelli Soares <sup>1,2</sup>, Samira Bernardino Ramos do Prado <sup>1,2</sup>, Sônia C.S. Andrade <sup>3</sup> and João Paulo Fabi <sup>1,2,4,\*</sup>

<sup>1</sup> Department of Food Science and Experimental Nutrition, School of Pharmaceutical Sciences, University of São Paulo, São Paulo 05508-000, Brazil; cagias@usp.br (C.G.S.); samira.prado@oru.se (S.B.R.d.P.)

<sup>2</sup> Food Research Center (FoRC), CEPID-FAPESP (Research, Innovation and Dissemination Centers, São Paulo Research Foundation), São Paulo 05508-080, Brazil

<sup>3</sup> Departamento de Genética e Biologia Evolutiva, Instituto de Biociências, Universidade São Paulo, São Paulo 05508-060, Brazil; soniacsandrade@ib.usp.br

<sup>4</sup> Food and Nutrition Research Center (NAPAN), University of São Paulo, São Paulo 05508-060, Brazil

\* Correspondence: author: jpfabi@usp.br; Tel.: +55-11-30913647

**Abstract:** Papaya is a fleshy fruit that undergoes fast ethylene-induced modifications. The fruit becomes edible, but the fast pulp softening is the main factor that limits the post-harvest period. Papaya fast pulp softening occurs due to cell wall disassembling coordinated by ethylene triggering that massively expresses pectinases. In this work, RNA-seq analysis of ethylene-treated and non-treated papayas enabled a wide transcriptome overview that indicated the role of ethylene during ripening at the gene expression level. Several families of transcription factors (AP2/ERF, NAC and MADS-box) were differentially expressed. ACO, ACS, and SAM-Mtase genes were up-regulated, indicating a high rate of ethylene biosynthesis after ethylene treatment. The correlation among gene expression and physiological data demonstrated ethylene treatment can indeed simulate ripening, and regulation of changes in fruit color, aroma and flavor could be attributed to the coordinated expression of several related genes. Especially about pulp firmness, the identification of 157 expressed genes related to cell wall metabolism demonstrated that unlike other climacteric and non-climacteric fruits, papaya does not need a previous action of pectate lyases and polygalacturonases are the main set of enzymes responsible for plant cell wall disassembling. The mechanism is systematically different for other commercially important fruits, such as strawberry, tomato, kiwifruit, and apple. The observed behavior of this new transcriptomic data is corroborated by the meta-analysis of several papaya transcriptomes, which confirmed ethylene triggering is the main event that elicits fast pulp softening in papayas.

**Keywords:** systems biology; papaya pulp softening; ethylene; post-harvest ripening-related modifications; pectinases; cell wall; climacteric fruit; non-climacteric fruit.

## Supplementary Material

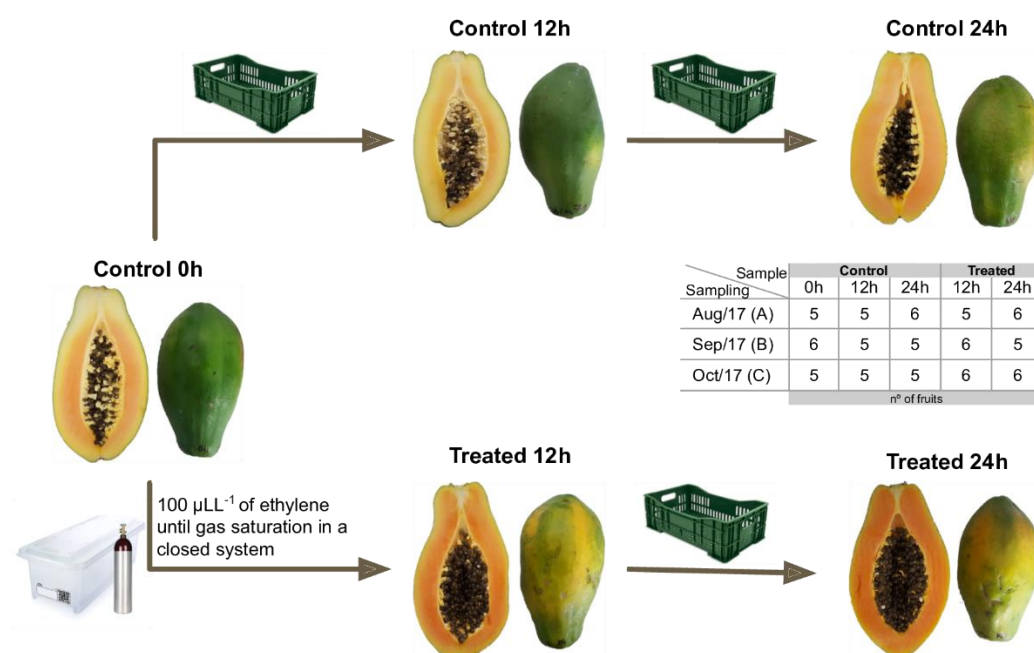

**Figure S1.** Sampling scheme. Scheme for dividing groups and sampling points. Each group consists of at least five fruits. This process was repeated three times, resulting in a biological triplicate.

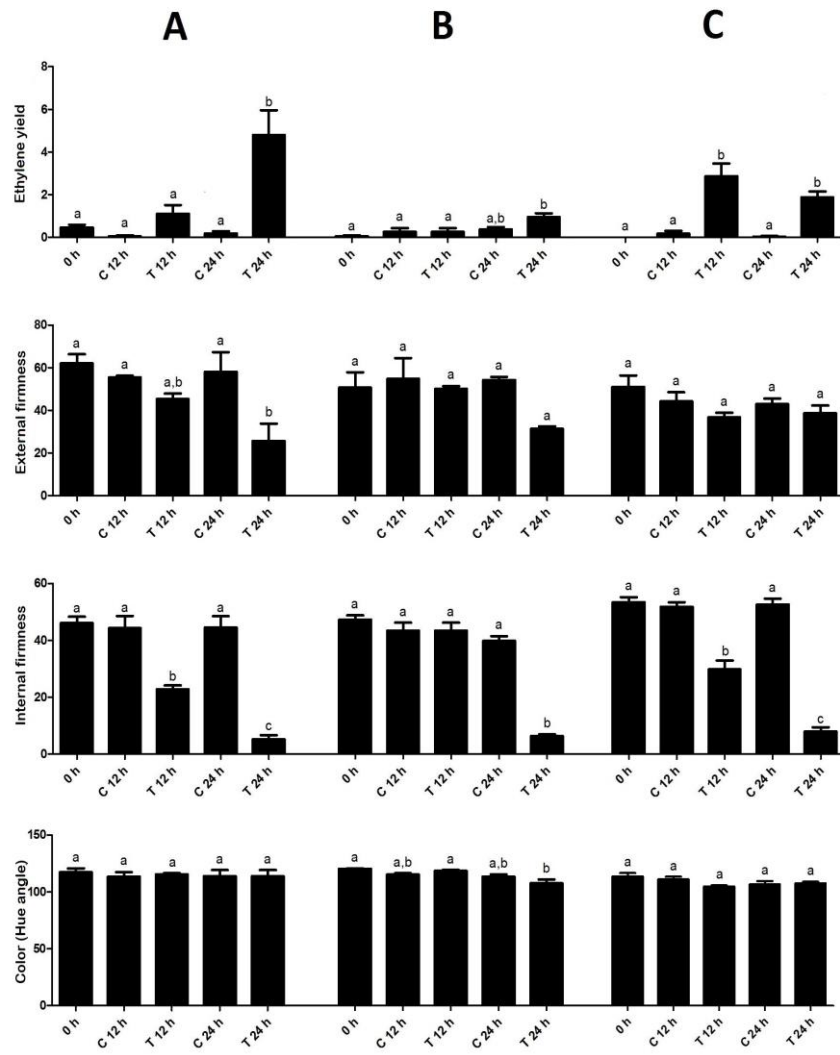

**Figure S2.** Ripening parameters measured for papaya treatment for all samplings. Ripening parameters: ethylene, ( $\mu\text{L.Kg}^{-1}.\text{h}^{-1}$ ), external firmness (N), internal firmness (N), and pulp color (hue angle). Five to six papayas were used for each time point (0 h, 12 h, and 24 h) for each biological replicate (A, B, and C). Samples are identified as C (control) or T (treated) followed by the time point.

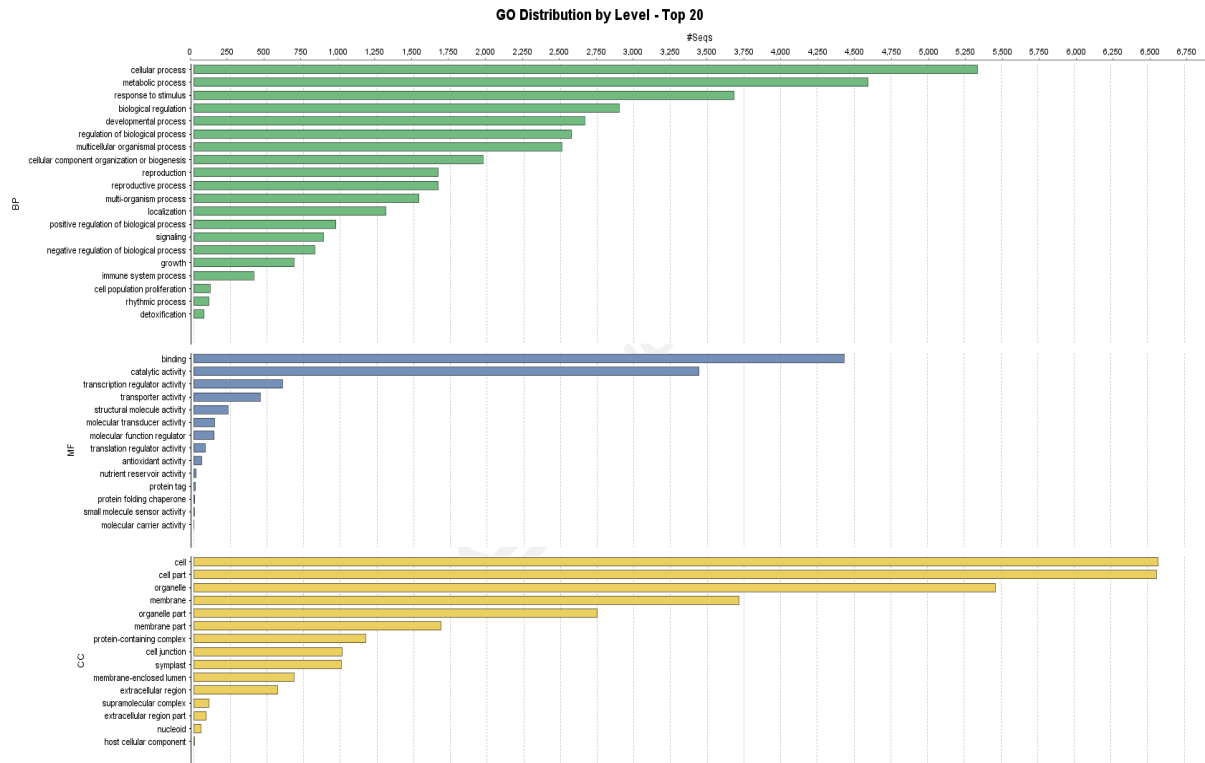

**Figure S3.** GO terms distribution per category. For each category, the 20 GO terms with the highest number of genes are represented. BP: Biological Process, MF: Molecular Function, CC: Cellular Component.

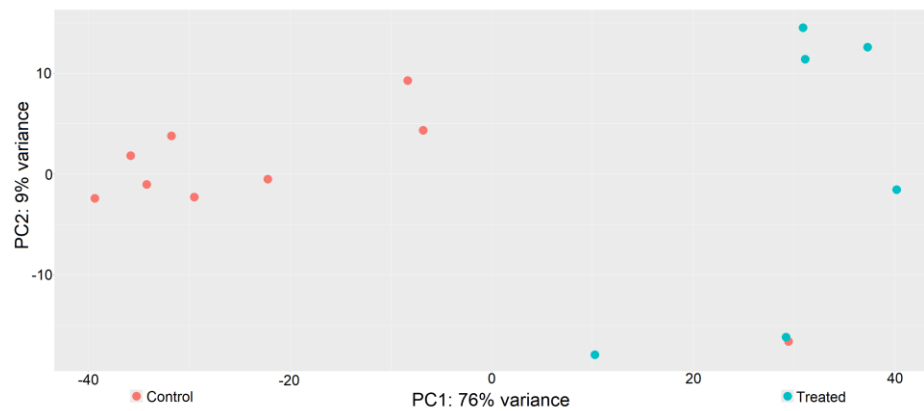

**Figure S4.** Principal Component Analysis of differentially expressed genes in papaya pulp. Total number of differentially expressed genes with  $p\text{-adj} \leq 0.05$  and  $\log_2\text{FC} > |1.5|$  between pairwise comparisons were compared. Samples are identified as red dots for control and blue dots for treated.

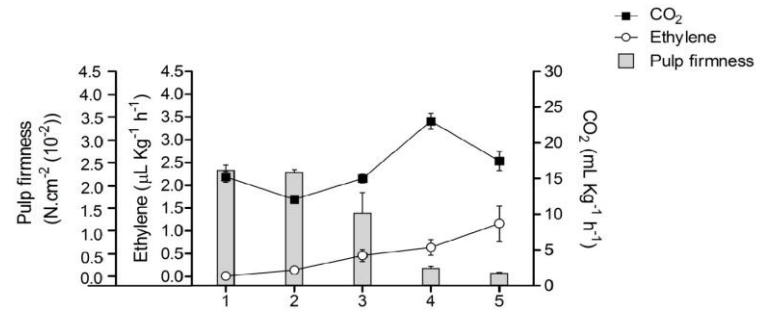

**Figure S5.** Ripening parameters of papaya samples used in qPCR experiments.

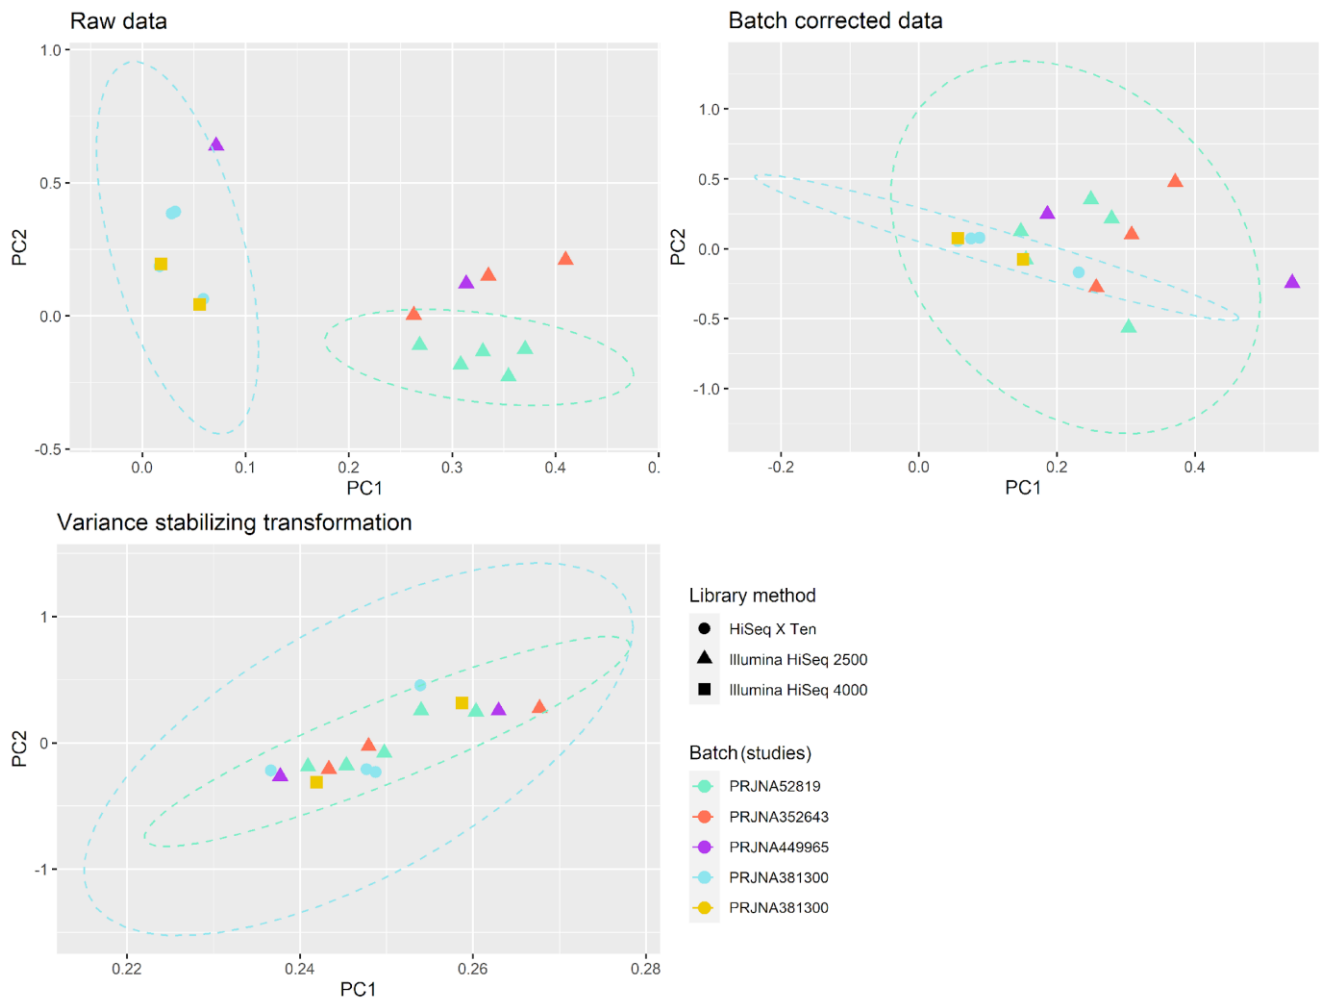

**Figure S6.** PCA plots of the steps to normalize the data. It was considered the differences between the platforms of sequencing, as well as the studies (batch).

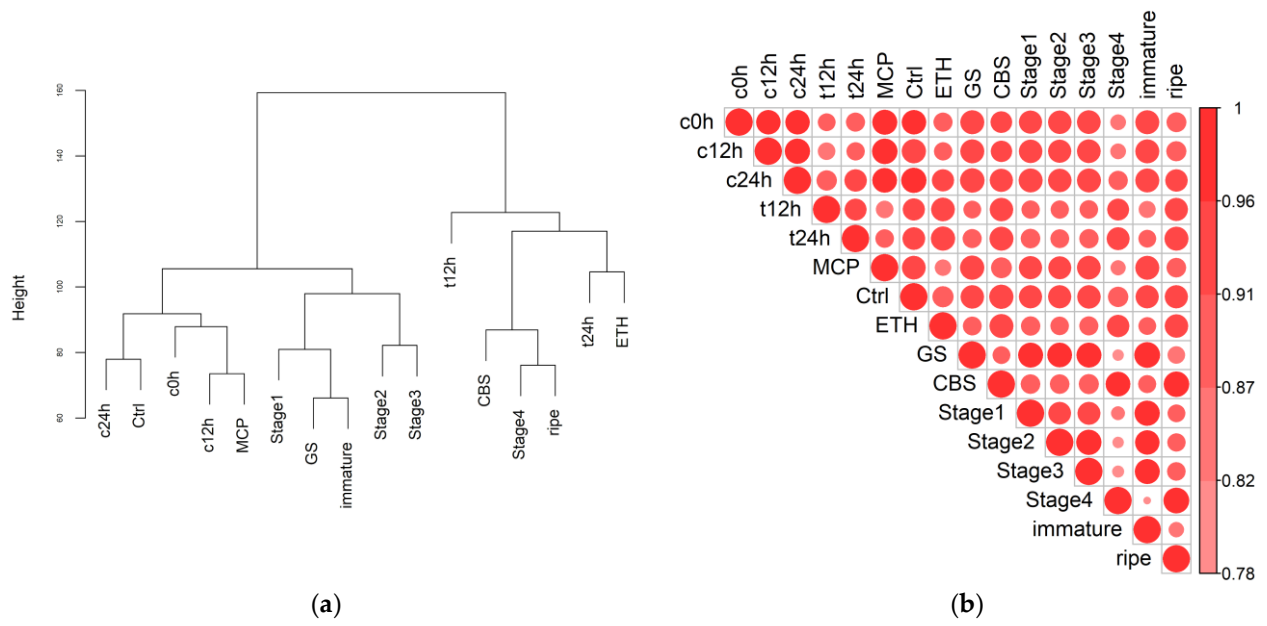

**Figure S7.** Cluster dendrogram and Pearson correlation of papaya transcriptomes data from data integration. Sample tags are depicted in Table 1. Circle size and color represent the correlation between samples.

**Table S1.** Nucleotide sequences used in qPCR.

| Gene  | Sequence (5'→3')                                           |
|-------|------------------------------------------------------------|
| PG1   | TGG TGG TGC GTA TAG ATG GA<br>ACA AAA CCC AGT ACC CAC CA   |
| PG2   | TCC TGA AGC TCA CCC TTC AT<br>CCT CAA TGC CTT TGA AGC TC   |
| PG3   | TTG GAG GGC AGC TTG TTT AG<br>CAC CCA AGC CTT TAT TGT TCC  |
| PL1   | TTC CCT GTG GGC TTA CAA TC<br>AGG GAG GTC TGC CAT TAC AT   |
| PL2   | CAT GTT CTT GTC CTG CGT GT<br>CCA TCC ACG GCT CTA ATT TC   |
| AGAL1 | GTA TAG GCG GAA GGT GGA T<br>AAG GCC ACC TCT CTG GAT       |
| AGAL3 | TGT CCG TTG ATC CTT CAG TG<br>AGT CCG GAA GAA TGC TGA TG   |
| BGAL1 | GTG CTT GCA ACT ATG CTG GA<br>ATA GGT TCG CAG TTG GGT TG   |
| BGAL3 | CCA AAG TGG GGA CAT TTG AG<br>ACA CCC AGA CTT CGA CTT G    |
| PME1  | TAT CTT GGT AGG CCC TGG A<br>AGG CCA GTG TTT CGG TAC T     |
| PME2  | GTG GTT TGT TCC TCA GCA CA<br>TGG AAC GTA ACT GCA AGT GG   |
| PME3  | GCA AGC TTT AGG GGT GTT GA<br>AGG CCT GCA GAG CTT ATT GA   |
| ACT   | CGT GAC CTT ACT GAT CAC TTG<br>GTC AAG GGC AAT GTA AGA CAG |
| EF1   | GTT AAG AAC GTT GCC GTG AAG<br>ATG TGA AGT TGG CTG CTT CCT |
| UBQ   | ACT CAC CGG CAA GAC CAT<br>GTG GAG AGT CGA TTC CTT TTG     |

---

**Table S2.** GenBank Annotations.

| <b>Gene</b> | <b>Accession number</b> |
|-------------|-------------------------|
| PG1         | FJ007644                |
| PG2         | GQ479791                |
| PG3         | GQ479794                |
| PL1         | DQ660903                |
| PL2         | ABIM01001816            |
| AGAL1       | ABIM01008846            |
| AGAL3       | ABIM01016598            |
| BGAL1       | AF064786                |
| BGAL3       | ABIM01026480            |
| PME1        | GR486204                |
| PME2        | ABIM01018702            |
| PME3        | ABIM01014785            |



**Table S3.** Calibration curves for relative gene expression.

| Gene  | Efficiency (10-slope) | y = ax+b          | R <sup>2</sup> |
|-------|-----------------------|-------------------|----------------|
| PG1   | 1.96                  | -3.4408x + 22.295 | 1              |
| PG2   | 1.94                  | -3.4841x + 27.584 | 0.99           |
| PG3   | 1.93                  | -3.4997x + 28.439 | 1              |
| PL1   | 1.98                  | -3.3722x + 23.508 | 1              |
| PL2   | 1.82                  | -3.8546x + 35.543 | 0.99           |
| AGAL1 | 2.2                   | -2.9239x + 25.249 | 0.99           |
| AGAL3 | 2.17                  | -2.9673x + 25.612 | 0.97           |
| BGAL1 | 2.05                  | -3.2145x + 24.034 | 0.99           |
| BGAL3 | 1.93                  | -3.4933x + 25.775 | 1              |
| PME1  | 1.95                  | -3.4408x + 22.295 | 1              |
| PME2  | 1.94                  | -3.4841x + 27.584 | 0.99           |
| PME3  | 1.93                  | -3.4997x + 28.439 | 1              |
| ARF   | 2                     | -3.3321x + 27.523 | 0.99           |
| XYL   | 1.94                  | -3.4742x + 23.389 | 1              |
| CELL  | 1.86                  | -3.7239x + 24.695 | 0.99           |
| XTH   | 1.74                  | -4.1503x + 28.827 | 0.99           |
| ACT   | 2.03                  | -3.2446x + 21.922 | 0.99           |
| EF1   | 1.92                  | -3.5886x + 25.540 | 0.98           |
| UBQ   | 1.89                  | -3.4841x + 22.049 | 0.99           |

**Table S4.** Differentially expressed genes related to ethylene.

| Gene      | Gene ID (NCBI) | Putative Function                                                      | Coding Enzyme |
|-----------|----------------|------------------------------------------------------------------------|---------------|
| gene11206 | LOC110815924   | 1-aminocyclopropane-1-carboxylate oxidase homolog 1-like               | ACO           |
| gene11209 | LOC110815808   | 1-aminocyclopropane-1-carboxylate oxidase homolog 1-like               | ACO           |
| gene18244 | LOC110823870   | 1-aminocyclopropane-1-carboxylate oxidase homolog 4-like               | ACO           |
| gene19881 | LOC110825516   | 1-aminocyclopropane-1-carboxylate oxidase homolog 1-like               | ACO           |
| gene19882 | LOC110825518   | 1-aminocyclopropane-1-carboxylate oxidase homolog 1-like               | ACO           |
| gene3976  | LOC110807747   | 1-aminocyclopropane-1-carboxylate oxidase homolog 1-like isoform X1    | ACO           |
| gene4262  | LOC110808078   | 1-aminocyclopropane-1-carboxylate oxidase                              | ACO           |
| gene4917  | LOC110808805   | 1-aminocyclopropane-1-carboxylate oxidase                              | ACO           |
| gene6521  | LOC110810572   | 1-aminocyclopropane-1-carboxylate oxidase homolog 4-like               | ACO           |
| gene9174  | LOC110813532   | 1-aminocyclopropane-1-carboxylate oxidase 5                            | ACO           |
| gene12660 | LOC110817493   | probable aminotransferase ACS10                                        | ACS           |
| gene1560  | LOC110819154   | 1-aminocyclopropane-1-carboxylate synthase-like                        | ACS           |
| gene17898 | LOC110823221   | probable aminotransferase ACS12 isoform X2                             | ACS           |
| gene821   | LOC110811354   | 1-aminocyclopropane-1-carboxylate synthase 1-like                      | ACS           |
| gene6573  | LOC110810650   | protein ethylene insensitive 3-like                                    | EIN           |
| gene7653  | LOC110811898   | ethylene insensitive 3a                                                | EIN           |
| gene9970  | LOC110814495   | ethylene insensitive 3-like 1 protein                                  | EIN           |
| gene11078 | LOC110815652   | AP2/ERF and B3 domain-containing transcription factor At1g50680-like   | ERF/AP2       |
| gene1120  | LOC110814499   | ethylene-responsive transcription factor RAP2-13-like                  | ERF/AP2       |
| gene11679 | LOC110816409   | ethylene-responsive transcription factor ERF113                        | ERF/AP2       |
| gene11897 | LOC110816728   | ethylene-responsive transcription factor ERF014-like                   | ERF/AP2       |
| gene11958 | LOC110816696   | ethylene-responsive transcription factor RAP2-4                        | ERF/AP2       |
| gene12180 | LOC110817045   | ethylene-responsive transcription factor ERF054-like                   | ERF/AP2       |
| gene13844 | LOC110818891   | ethylene-responsive transcription factor RAP2-1-like                   | ERF/AP2       |
| gene15594 | LOC110820757   | transcription termination factor MTERF9                                | ERF/AP2       |
| gene16077 | LOC110821290   | transcription termination factor MTERF4                                | ERF/AP2       |
| gene1813  | LOC110822141   | ethylene-responsive transcription factor RAP2-12-like                  | ERF/AP2       |
| gene18563 | LOC110824230   | ethylene-responsive transcription factor ERF119                        | ERF/AP2       |
| gene19906 | LOC110825544   | ethylene-responsive transcription factor ERF036-like                   | ERF/AP2       |
| gene2448  | LOC110826171   | ethylene-responsive transcription factor ERF016-like                   | ERF/AP2       |
| gene2737  | LOC110806359   | AP2-like ethylene-responsive transcription factor At2g41710 isoform X1 | ERF/AP2       |
| gene3058  | LOC110806714   | AP2-like ethylene-responsive transcription factor At1g16060            | ERF/AP2       |
| gene426   | LOC110807473   | ethylene-responsive transcription factor RAP2-3-like                   | ERF/AP2       |
| gene4688  | LOC110808549   | ethylene-responsive transcription factor RAP2-7                        | ERF/AP2       |
| gene7173  | LOC110811357   | ethylene-responsive transcription factor ERF015                        | ERF/AP2       |
| gene7636  | LOC110811803   | AP2-like ethylene-responsive transcription factor PLT2 isoform X2      | ERF/AP2       |
| gene8556  | LOC110812914   | ethylene-responsive transcription factor ABR1-like                     | ERF/AP2       |
| gene9224  | LOC110813758   | ethylene-responsive transcription factor ERF109-like                   | ERF/AP2       |
| gene10466 | LOC110815052   | agamous-like MADS-box protein AGL1 isoform X1                          | MADS          |
| gene1060  | LOC110813824   | agamous-like MADS-box protein AGL62                                    | MADS          |
| gene11347 | LOC110815973   | agamous-like MADS-box protein AGL62                                    | MADS          |
| gene1150  | LOC110814794   | MADS-box transcription factor 27-like                                  | MADS          |
| gene12638 | LOC110817459   | agamous-like MADS-box protein AGL19                                    | MADS          |
| gene13711 | LOC110818772   | MADS-box protein AGL24-like isoform X1                                 | MADS          |
| gene1518  | LOC110818645   | MADS-box protein CMB1                                                  | MADS          |
| gene17642 | LOC110823018   | MADS-box protein AGL42                                                 | MADS          |
| gene1831  | LOC110822337   | agamous-like MADS-box protein AGL11                                    | MADS          |
| gene18455 | LOC110824197   | agamous-like MADS-box protein AGL30 isoform X2                         | MADS          |
| gene19366 | LOC110824954   | agamous-like MADS-box protein AGL18                                    | MADS          |
| gene3579  | LOC110807301   | MADS-box transcription factor 23-like isoform X3                       | MADS          |
| gene5301  | LOC110809260   | agamous-like MADS-box protein AGL30                                    | MADS          |
| gene8906  | LOC110813260   | agamous-like MADS-box protein AGL104                                   | MADS          |
| gene9820  | LOC110814435   | MADS-box protein SVP                                                   | MADS          |
| gene10128 | LOC110814672   | NAC domain-containing protein 78-like                                  | NAC           |
| gene11472 | LOC110816152   | NAC domain-containing protein 82-like                                  | NAC           |
| gene11492 | LOC110816201   | NAC domain-containing protein 104-like                                 | NAC           |
| gene12931 | LOC110817727   | NAC transcription factor 25                                            | NAC           |
| gene13848 | LOC110818781   | NAC domain-containing protein 72-like                                  | NAC           |
| gene1443  | LOC110817864   | NAC domain-containing protein 53-like                                  | NAC           |
| gene15050 | LOC110820288   | NAC domain-containing protein 100-like                                 | NAC           |
| gene1617  | LOC110819852   | NAC domain-containing protein 79-like                                  | NAC           |
| gene17606 | LOC110822981   | NAC domain-containing protein 83                                       | NAC           |

|           |              |                                                                     |     |
|-----------|--------------|---------------------------------------------------------------------|-----|
| gene17830 | LOC110823491 | NAC domain-containing protein 62-like                               | NAC |
| gene18457 | LOC110824264 | NAC transcription factor 29-like                                    | NAC |
| gene2236  | LOC110825934 | NAC domain-containing protein 35                                    | NAC |
| gene3001  | LOC110806658 | NAC domain-containing protein 62-like                               | NAC |
| gene3162  | LOC110806832 | NAC domain-containing protein 90                                    | NAC |
| gene375   | LOC110807011 | NAC domain-containing protein 10                                    | NAC |
| gene3886  | LOC110807683 | NAC domain-containing protein 21/22-like isoform X2                 | NAC |
| gene5914  | LOC110809964 | NAC domain-containing protein 102-like                              | NAC |
| gene6043  | LOC110810112 | NAC domain-containing protein 100                                   | NAC |
| gene6386  | LOC110810455 | NAC domain-containing protein 41-like isoform X1                    | NAC |
| gene6701  | LOC110810834 | NAC domain-containing protein 83                                    | NAC |
| gene6988  | LOC110811156 | NAC domain-containing protein 30-like                               | NAC |
| gene7210  | LOC110811410 | NAC domain-containing protein 71-like                               | NAC |
| gene8687  | LOC110812963 | NAC domain-containing protein 83                                    | NAC |
| gene9094  | LOC110813524 | NAC domain-containing protein 30-like                               | NAC |
| gene9148  | LOC110813582 | NAC domain-containing protein 2-like                                | NAC |
| gene10013 | LOC110814610 | S-adenosylmethionine decarboxylase proenzyme                        | SAM |
| gene11023 | LOC110815710 | uncharacterized methyltransferase At2g41040                         | SAM |
| gene11505 | LOC110816192 | putative methyltransferase DDB_G0268948                             | SAM |
| gene11924 | LOC110816733 | S-adenosyl-L-methionine-dependent tRNA 4-demethylwyosine synthase   | SAM |
| gene11925 | LOC110816673 | probable methyltransferase PMT28                                    | SAM |
| gene11991 | LOC110816762 | probable pectin methyltransferase QUA2                              | SAM |
| gene12458 | LOC110817288 | uncharacterized protein LOC110817288                                | SAM |
| gene12468 | LOC110817300 | uncharacterized protein LOC110817300 isoform X1                     | SAM |
| gene13105 | LOC110818250 | uncharacterized protein LOC110818250                                | SAM |
| gene13140 | LOC110818142 | probable methyltransferase PMT24                                    | SAM |
| gene13163 | LOC110818280 | probable methyltransferase PMT27                                    | SAM |
| gene13799 | LOC110818807 | uncharacterized protein At2g23090-like                              | SAM |
| gene14221 | LOC110819234 | probable methyltransferase PMT22                                    | SAM |
| gene1430  | LOC110817772 | S-adenosylmethionine decarboxylase proenzyme-like                   | SAM |
| gene14343 | LOC110819192 | probable methyltransferase PMT11                                    | SAM |
| gene14524 | LOC110819466 | probable methyltransferase PMT13                                    | SAM |
| gene14528 | LOC110819609 | probable methyltransferase PMT15                                    | SAM |
| gene14638 | LOC110819718 | uncharacterized protein LOC110819718                                | SAM |
| gene15451 | LOC110820875 | methyltransferase-like protein 5 isoform X2                         | SAM |
| gene15803 | LOC110821026 | uncharacterized protein LOC110821026                                | SAM |
| gene1588  | LOC110819478 | probable methyltransferase PMT3                                     | SAM |
| gene16266 | LOC110821237 | probable methyltransferase PMT27                                    | SAM |
| gene16732 | LOC110821949 | uncharacterized protein LOC110821949                                | SAM |
| gene16996 | LOC110822495 | probable methyltransferase PMT27                                    | SAM |
| gene17396 | LOC110822617 | putative methyltransferase DDB_G0268948 isoform X1                  | SAM |
| gene17397 | LOC110822698 | putative methyltransferase DDB_G0268948                             | SAM |
| gene17551 | LOC110823023 | uncharacterized protein LOC110823023                                | SAM |
| gene1771  | LOC110821716 | probable methyltransferase PMT20                                    | SAM |
| gene19264 | LOC110824843 | probable S-adenosylmethionine-dependent methyltransferase At5g38780 | SAM |
| gene19467 | LOC110825064 | probable methyltransferase PMT21                                    | SAM |
| gene2071  | LOC110825210 | uncharacterized protein LOC110825210                                | SAM |
| gene2090  | LOC110825401 | probable methyltransferase PMT18                                    | SAM |
| gene250   | LOC110825890 | probable methyltransferase PMT26                                    | SAM |
| gene3697  | LOC110807416 | uncharacterized protein LOC110807416 isoform X2                     | SAM |
| gene3709  | LOC110807474 | probable S-adenosylmethionine-dependent methyltransferase At5g37990 | SAM |
| gene3807  | LOC110807564 | uncharacterized protein LOC110807564                                | SAM |
| gene4479  | LOC110808295 | S-adenosylmethionine synthase 2                                     | SAM |
| gene4610  | LOC110808470 | uncharacterized protein LOC110808470                                | SAM |
| gene5085  | LOC110808988 | probable methyltransferase PMT9                                     | SAM |
| gene5189  | LOC110809125 | probable methyltransferase PMT2                                     | SAM |
| gene5374  | LOC110809320 | methyltransferase-like protein 13                                   | SAM |
| gene6027  | LOC110810110 | probable methyltransferase PMT2 isoform X1                          | SAM |
| gene6206  | LOC110810353 | probable methyltransferase PMT15 isoform X1                         | SAM |
| gene6624  | LOC110810745 | S-adenosylmethionine synthase 3                                     | SAM |
| gene7179  | LOC110811374 | (S)-coclaurine N-methyltransferase-like                             | SAM |
| gene7691  | LOC110811946 | methyltransferase-like protein 13                                   | SAM |
| gene8021  | LOC110812319 | uncharacterized protein LOC110812319                                | SAM |
| gene8617  | LOC110813022 | S-adenosylmethionine decarboxylase proenzyme-like                   | SAM |
| gene8823  | LOC110813193 | S-adenosylmethionine synthase                                       | SAM |

---

|          |              |                                                 |     |
|----------|--------------|-------------------------------------------------|-----|
| gene9683 | LOC110814181 | uncharacterized protein LOC110814181 isoform X2 | SAM |
|----------|--------------|-------------------------------------------------|-----|

---

**Table S5.** Differentially expressed genes related to cell wall metabolism during papaya ripening.

| Gene      | Gene ID (NCBI) | Putative Function                                                          | Coding Enzyme |
|-----------|----------------|----------------------------------------------------------------------------|---------------|
| gene1360  | LOC110817097   | alpha-galactosidase 1-like                                                 | A-GAL         |
| gene14164 | LOC110819226   | alpha-galactosidase 3                                                      | A-GAL         |
| gene3830  | LOC110807600   | mannosyl-oligosaccharide 1,2-alpha-mannosidase MNS3, partial               | A-MANN        |
| gene6084  | LOC110810147   | alpha-mannosidase I MNS5 isoform X1                                        | A-MANN        |
| gene6889  | LOC110811093   | mannosyl-oligosaccharide 1,2-alpha-mannosidase MNS1-like isoform X1        | A-MANN        |
| gene879   | LOC110811995   | mannosyl-oligosaccharide 1,2-alpha-mannosidase MNS1-like                   | A-MANN        |
| gene8799  | LOC110813200   | mannosyl-oligosaccharide 1,2-alpha-mannosidase MNS2-like, partial          | A-MANN        |
| gene9560  | LOC110814068   | alpha-mannosidase I MNS4                                                   | A-MANN        |
| gene1032  | LOC110813559   | lysine-rich arabinogalactan protein 18                                     | AGP           |
| gene10377 | LOC110814932   | arabinogalactan peptide 13-like                                            | AGP           |
| gene11392 | LOC110816092   | classical arabinogalactan protein 9-like                                   | AGP           |
| gene11393 | LOC110816167   | classical arabinogalactan protein 1                                        | AGP           |
| gene12026 | LOC110816610   | classical arabinogalactan protein 10                                       | AGP           |
| gene12118 | LOC110816923   | fasciclin-like arabinogalactan protein 21                                  | AGP           |
| gene12343 | LOC110817139   | fasciclin-like arabinogalactan protein 17                                  | AGP           |
| gene12891 | LOC110817819   | non-classical arabinogalactan protein 31-like                              | AGP           |
| gene14281 | LOC110819182   | Fasciclin-like arabinogalactan family protein                              | AGP           |
| gene14835 | LOC110819981   | classical arabinogalactan protein 27                                       | AGP           |
| gene15557 | LOC110820823   | fasciclin-like arabinogalactan protein 1                                   | AGP           |
| gene17706 | LOC110823186   | arabinogalactan peptide 22-like                                            | AGP           |
| gene18615 | LOC110824087   | lysine-rich arabinogalactan protein 19                                     | AGP           |
| gene2775  | LOC110806382   | fasciclin-like arabinogalactan protein 17                                  | AGP           |
| gene2830  | LOC110806455   | classical arabinogalactan protein 7-like                                   | AGP           |
| gene3877  | LOC110807696   | fasciclin-like arabinogalactan protein 13                                  | AGP           |
| gene4805  | LOC110808736   | fasciclin-like arabinogalactan protein 2                                   | AGP           |
| gene5562  | LOC110809511   | arabinogalactan peptide 13-like                                            | AGP           |
| gene803   | LOC110811190   | fasciclin-like arabinogalactan protein 4 isoform X1                        | AGP           |
| gene12218 | LOC110816900   | alpha-L-arabinofuranosidase 1-like                                         | ARA           |
| gene12413 | LOC110817099   | alpha-L-arabinofuranosidase 1-like isoform X2                              | ARA           |
| gene11696 | LOC110816435   | beta-galactosidase 10                                                      | B-GAL         |
| gene11704 | LOC110816515   | beta-galactosidase 6 isoform X2                                            | B-GAL         |
| gene12775 | LOC110817680   | beta-galactosidase 15 isoform X1                                           | B-GAL         |
| gene12802 | LOC110817677   | beta-galactosidase 15 isoform X1                                           | B-GAL         |
| gene13406 | LOC110818407   | beta-galactosidase 1 isoform X1                                            | B-GAL         |
| gene1695  | LOC110820693   | uncharacterized protein LOC110820693                                       | B-GAL         |
| gene16987 | LOC110822129   | beta-galactosidase 3                                                       | B-GAL         |
| gene2838  | LOC110806458   | beta-galactosidase 8                                                       | B-GAL         |
| gene6671  | LOC110810818   | beta-galactosidase 5                                                       | B-GAL         |
| gene7019  | LOC110811182   | beta-galactosidase-like                                                    | B-GAL         |
| gene7693  | LOC110811947   | beta-galactosidase 9-like                                                  | B-GAL         |
| gene9153  | LOC110813600   | beta-galactosidase 16 isoform X1                                           | B-GAL         |
| gene9155  | LOC110813537   | beta-galactosidase 16-like isoform X1                                      | B-GAL         |
| gene10728 | LOC110815331   | mannosylglycoprotein endo-beta-mannosidase                                 | B-MANN        |
| gene12216 | LOC110816958   | mannan endo-1,4-beta-mannosidase 2-like                                    | B-MANN        |
| gene16952 | LOC110822316   | mannan endo-1,4-beta-mannosidase 7                                         | B-MANN        |
| gene7425  | LOC110811647   | mannan endo-1,4-beta-mannosidase 6                                         | B-MANN        |
| gene940   | LOC110812631   | mannan endo-1,4-beta-mannosidase 1, partial                                | B-MANN        |
| gene9675  | LOC110814153   | mannan endo-1,4-beta-mannosidase 1, partial                                | B-MANN        |
| gene10588 | LOC110815157   | endoglucanase 25-like                                                      | CELL-ase      |
| gene12309 | LOC110817105   | Cellulase (glycosyl hydrolase family 5) protein                            | CELL-ase      |
| gene12310 | LOC110817068   | Cellulase (glycosyl hydrolase family 5) protein                            | CELL-ase      |
| gene12311 | LOC110817069   | Cellulase (glycosyl hydrolase family 5) protein                            | CELL-ase      |
| gene13783 | LOC110818785   | endoglucanase 3                                                            | CELL-ase      |
| gene14581 | LOC110819632   | endoglucanase 25-like                                                      | CELL-ase      |
| gene17040 | LOC110822284   | endoglucanase 24-like                                                      | CELL-ase      |
| gene18257 | LOC110823831   | endoglucanase 8                                                            | CELL-ase      |
| gene20068 | LOC110825722   | endoglucanase 6-like                                                       | CELL-ase      |
| gene4328  | LOC110808110   | endoglucanase 25-like                                                      | CELL-ase      |
| gene10632 | LOC110815166   | cellulose synthase A catalytic subunit 2 [UDP-forming]-like                | CELL-syn      |
| gene11115 | LOC110815766   | cellulose synthase A catalytic subunit 7 [UDP-forming]-like                | CELL-syn      |
| gene11930 | LOC110816665   | probable cellulose synthase A catalytic subunit 5 [UDP-forming] isoform X2 | CELL-syn      |
| gene13050 | LOC110817890   | cellulose synthase-like protein E6                                         | CELL-syn      |

|           |              |                                                                        |          |
|-----------|--------------|------------------------------------------------------------------------|----------|
| gene13051 | LOC110817796 | cellulose synthase-like protein E6 isoform X1                          | CELL-syn |
| gene147   | LOC110817465 | cellulose synthase A catalytic subunit 6 [UDP-forming]-like isoform X2 | CELL-syn |
| gene14914 | LOC110820068 | cellulose synthase-like protein G3 isoform X1                          | CELL-syn |
| gene16477 | LOC110821594 | cellulose synthase, putative (DUF1644)                                 | CELL-syn |
| gene19062 | LOC110824624 | cellulose synthase-like D3                                             | CELL-syn |
| gene19957 | LOC110825603 | cellulose synthase A catalytic subunit 3 [UDP-forming]-like            | CELL-syn |
| gene5787  | LOC110809801 | cellulose synthase A catalytic subunit 1 [UDP-forming]                 | CELL-syn |
| gene8551  | LOC110812917 | cellulose synthase A catalytic subunit 2 [UDP-forming]                 | CELL-syn |
| gene957   | LOC110812813 | cellulose synthase-like protein D2, partial                            | CELL-syn |
| gene10529 | LOC110815026 | exopolygalacturonase-like                                              | exo-PG   |
| gene10338 | LOC110814908 | expansin-A15-like                                                      | EXP      |
| gene13333 | LOC110818133 | expansin-A11                                                           | EXP      |
| gene14044 | LOC110818908 | expansin-like A2                                                       | EXP      |
| gene14153 | LOC110819370 | expansin-A8                                                            | EXP      |
| gene18313 | LOC110823677 | expansin-A8-like, partial                                              | EXP      |
| gene18763 | LOC110824164 | expansin-A4                                                            | EXP      |
| gene19599 | LOC110825207 | expansin-like B1                                                       | EXP      |
| gene2480  | LOC110826208 | expansin-A6-like                                                       | EXP      |
| gene3555  | LOC110807298 | expansin-A13                                                           | EXP      |
| gene10889 | LOC110815466 | pectin acetyltransferase 12-like isoform X1                            | PAE      |
| gene1193  | LOC110815318 | pectin acetyltransferase 8 isoform X1                                  | PAE      |
| gene4550  | LOC110808409 | pectin acetyltransferase 7-like                                        | PAE      |
| gene9661  | LOC110814143 | pectin acetyltransferase 6-like isoform X1                             | PAE      |
| gene12584 | LOC110817416 | polygalacturonase QRT3-like isoform X1                                 | PG       |
| gene12777 | LOC110817723 | probable polygalacturonase                                             | PG       |
| gene15943 | LOC110821202 | probable polygalacturonase At1g80170 isoform X2                        | PG       |
| gene16066 | LOC110821401 | probable polygalacturonase                                             | PG       |
| gene1797  | LOC110821988 | probable polygalacturonase                                             | PG       |
| gene2536  | LOC110826274 | polygalacturonase-like                                                 | PG       |
| gene3486  | LOC110807205 | probable polygalacturonase                                             | PG       |
| gene5336  | LOC110809302 | polygalacturonase QRT2-like                                            | PG       |
| gene7049  | LOC110811267 | polygalacturonase-like isoform X1                                      | PG       |
| gene9058  | LOC110813488 | polygalacturonase-like                                                 | PG       |
| gene9059  | LOC110813489 | polygalacturonase-like                                                 | PG       |
| gene9649  | LOC110814146 | probable polygalacturonase                                             | PG       |
| gene14785 | LOC110819881 | polygalacturonase inhibitor protein, partial                           | PGI      |
| gene19582 | LOC110825189 | polygalacturonase inhibitor (DUF639)                                   | PGI      |
| gene19834 | LOC110825467 | polygalacturonase inhibitor (DUF639)                                   | PGI      |
| gene38    | LOC110807182 | polygalacturonase inhibitor (DUF639)                                   | PGI      |
| gene10120 | LOC110814542 | probable pectate lyase 13                                              | PL       |
| gene14718 | LOC110819800 | pectate lyase-like                                                     | PL       |
| gene16482 | LOC110821787 | probable pectate lyase 8 isoform X2                                    | PL       |
| gene171   | LOC110819499 | probable pectate lyase 4, partial                                      | PL       |
| gene17454 | LOC110822705 | probable pectate lyase 3                                               | PL       |
| gene17545 | LOC110823044 | probable pectate lyase 5                                               | PL       |
| gene4246  | LOC110808054 | putative pectate lyase 2, partial                                      | PL       |
| gene9513  | LOC110813995 | probable pectate lyase 1                                               | PL       |
| gene10769 | LOC110815463 | pectinesterase (Protein of unknown function, DUF538)                   | PME      |
| gene10836 | LOC110815417 | probable pectinesterase 29                                             | PME      |
| gene13357 | LOC110818178 | putative pectinesterase 11                                             | PME      |
| gene13517 | LOC110818404 | pectinesterase 1                                                       | PME      |
| gene14736 | LOC110819677 | pectinesterase 1                                                       | PME      |
| gene15057 | LOC110820172 | pectinesterase 31                                                      | PME      |
| gene16191 | LOC110821415 | pectinesterase (Protein of unknown function, DUF538)                   | PME      |
| gene16192 | LOC110821414 | pectinesterase (Protein of unknown function, DUF538)                   | PME      |
| gene17689 | LOC110823327 | putative pectinesterase 63                                             | PME      |
| gene3087  | LOC110806763 | pectinesterase                                                         | PME      |
| gene4292  | LOC110808164 | pectinesterase-like                                                    | PME      |
| gene4527  | LOC110808384 | probable pectinesterase 53                                             | PME      |
| gene10533 | LOC110815072 | probable pectinesterase/pectinesterase inhibitor 58                    | PMEI     |
| gene10774 | LOC110815485 | pectinesterase inhibitor-like                                          | PMEI     |
| gene11454 | LOC110816184 | probable pectinesterase/pectinesterase inhibitor 51                    | PMEI     |
| gene12359 | LOC110817077 | probable pectinesterase/pectinesterase inhibitor 46                    | PMEI     |
| gene12707 | LOC110817457 | pectinesterase inhibitor 10                                            | PMEI     |
| gene12708 | LOC110817609 | pectinesterase inhibitor 9-like isoform X3                             | PMEI     |

---

|           |              |                                                               |      |
|-----------|--------------|---------------------------------------------------------------|------|
| gene13023 | LOC110817778 | pectinesterase inhibitor 5-like                               | PMEI |
| gene15998 | LOC110821276 | pectinesterase inhibitor-like                                 | PMEI |
| gene17738 | LOC110823232 | probable pectinesterase/pectinesterase inhibitor 34           | PMEI |
| gene17935 | LOC110823499 | pectinesterase inhibitor 4                                    | PMEI |
| gene17936 | LOC110823071 | pectinesterase inhibitor 11                                   | PMEI |
| gene17939 | LOC110823299 | probable pectinesterase/pectinesterase inhibitor 59           | PMEI |
| gene4520  | LOC110808377 | probable pectinesterase/pectinesterase inhibitor 36           | PMEI |
| gene4522  | LOC110808380 | pectinesterase inhibitor 9                                    | PMEI |
| gene699   | LOC110810171 | probable pectinesterase/pectinesterase inhibitor 12           | PMEI |
| gene19959 | LOC110825605 | probable rhamnogalacturonate lyase B, partial                 | rglB |
| gene19960 | LOC110825606 | probable rhamnogalacturonate lyase B, partial                 | rglB |
| gene3582  | LOC110807303 | probable rhamnogalacturonate lyase B isoform X1               | rglB |
| gene12117 | LOC110817030 | xyloglucan endotransglucosylase/hydrolase protein 9           | XTH  |
| gene16436 | LOC110821790 | putative xyloglucan endotransglucosylase/hydrolase protein 1  | XTH  |
| gene18197 | LOC110823748 | probable xyloglucan endotransglucosylase/hydrolase protein 28 | XTH  |
| gene18427 | LOC110824296 | xyloglucan endotransglucosylase/hydrolase protein 31          | XTH  |
| gene2660  | LOC110826398 | probable xyloglucan endotransglucosylase/hydrolase protein 25 | XTH  |
| gene2663  | LOC110826405 | xyloglucan endotransglucosylase/hydrolase protein 24-like     | XTH  |
| gene2664  | LOC110826410 | probable xyloglucan endotransglucosylase/hydrolase protein 23 | XTH  |
| gene2950  | LOC110806596 | probable xyloglucan endotransglucosylase/hydrolase protein 30 | XTH  |
| gene3084  | LOC110806756 | probable xyloglucan endotransglucosylase/hydrolase protein 8  | XTH  |
| gene5145  | LOC110809080 | probable xyloglucan endotransglucosylase/hydrolase protein 6  | XTH  |
| gene6942  | LOC110811082 | probable xyloglucan endotransglucosylase/hydrolase protein 23 | XTH  |
| gene8626  | LOC110813037 | probable xyloglucan endotransglucosylase/hydrolase protein 5  | XTH  |
| gene12726 | LOC110817606 | probable xyloglucan galactosyltransferase GT19                | XYG  |
| gene17892 | LOC110823425 | xyloglucan galactosyltransferase XLT2                         | XYG  |
| gene4133  | LOC110807966 | probable xyloglucan galactosyltransferase GT14                | XYG  |
| gene4134  | LOC110807938 | probable xyloglucan galactosyltransferase GT14                | XYG  |
| gene7317  | LOC110811520 | xyloglucan galactosyltransferase MUR3, partial                | XYG  |
| gene7908  | LOC110812108 | probable xyloglucan galactosyltransferase GT11                | XYG  |

---
